# Supplementary material for: Accuracy of Opportunistic Bone Mineral Density Assessment on Staging Computed Tomography for Gynaecological Cancers
Source: MDPI journal article supplement (doi:10.3390/medicina57121386), 2021-12-20
Supplement: s1 [file s1]

Table S1: Threshold analysis to identify the statistically optimal CT-HU cut-off level for diagnosis of low BMD.

| <b>T12</b> | Value equal or lower than | Sensitivity | 1-Specificity | Specificity | Youden J stat |
|------------|---------------------------|-------------|---------------|-------------|---------------|
|            | 42.0                      | 0.000       | 0.000         | 1.000       | 0.000         |
|            | 64.0                      | .032        | 0.000         | 1.000       | 0.032         |
|            | 93.5                      | .097        | 0.000         | 1.000       | 0.097         |
|            | 103.0                     | .129        | .059          | 0.941       | 0.070         |
|            | 106.5                     | .194        | .059          | 0.941       | 0.135         |
|            | 109.5                     | .194        | .118          | 0.882       | 0.076         |
|            | 110.5                     | .226        | .118          | 0.882       | 0.108         |
|            | 114.0                     | .258        | .118          | 0.882       | 0.140         |
|            | 118.0                     | .290        | .118          | 0.882       | 0.173         |
|            | 120.0                     | .355        | .118          | 0.882       | 0.237         |
|            | 122.5                     | .387        | .118          | 0.882       | 0.269         |
|            | 125.0                     | .387        | .176          | 0.824       | 0.211         |
|            | 126.5                     | .419        | .176          | 0.824       | 0.243         |
|            | 129.5                     | .484        | .176          | 0.824       | 0.307         |
|            | 132.5                     | .516        | .176          | 0.824       | 0.340         |
|            | 133.5                     | .548        | .176          | 0.824       | 0.372         |
|            | 138.0                     | .581        | .176          | 0.824       | 0.404         |
|            | 142.5                     | .613        | .176          | 0.824       | 0.436         |
|            | 144.0                     | .613        | .235          | 0.765       | 0.378         |
|            | 146.5                     | .645        | .235          | 0.765       | 0.410         |
|            | 149.0                     | .677        | .235          | 0.765       | 0.442         |
|            | 152.0                     | .710        | .235          | 0.765       | 0.474         |
|            | 156.0                     | .742        | .235          | 0.765       | 0.507         |
|            | 159.0                     | .774        | .235          | 0.765       | 0.539         |
|            | 163.0                     | .774        | .294          | 0.706       | 0.480         |
|            | 167.0                     | .806        | .294          | 0.706       | 0.512         |
|            | 168.5                     | .806        | .353          | 0.647       | 0.454         |
|            | 171.5                     | .839        | .412          | 0.588       | 0.427         |
|            | 176.0                     | .839        | .471          | 0.529       | 0.368         |
|            | 179.5                     | .871        | .471          | 0.529       | 0.400         |
|            | 183.5                     | .903        | .529          | 0.471       | 0.374         |
|            | 194.5                     | .903        | .588          | 0.412       | 0.315         |
|            | 204.0                     | .903        | .706          | 0.294       | 0.197         |
|            | 207.5                     | .935        | .706          | 0.294       | 0.230         |
|            | 214.0                     | .935        | .824          | 0.176       | 0.112         |
|            | 222.0                     | .935        | .882          | 0.118       | 0.053         |
|            | 232.0                     | .935        | .941          | 0.059       | -0.006        |
|            | 246.5                     | .935        | 1.000         | 0.000       | -0.065        |
|            | 267.5                     | .968        | 1.000         | 0.000       | -0.032        |
|            | 281.0                     | 1.000       | 1.000         | 0.000       | 0.000         |

Table S1: Threshold analysis to identify the statistically optimal CT-HU cut-off level for diagnosis of low BMD.

| L1 | Value equal or lower than | Sensitivity | 1 - Specificity | Specificity | Youden J stat |
|----|---------------------------|-------------|-----------------|-------------|---------------|
|    | -1                        | 0           | 0               | 1           | 0             |
|    | 41                        | 0.032       | 0               | 1           | 0.032         |
|    | 84                        | 0.065       | 0               | 1           | 0.065         |
|    | 88                        | 0.097       | 0               | 1           | 0.097         |
|    | 91                        | 0.129       | 0               | 1           | 0.129         |
|    | 97.5                      | 0.161       | 0               | 1           | 0.161         |
|    | 104                       | 0.194       | 0               | 1           | 0.194         |
|    | 105.5                     | 0.226       | 0               | 1           | 0.226         |
|    | 108.5                     | 0.226       | 0.118           | 0.882       | 0.108         |
|    | 111.5                     | 0.29        | 0.118           | 0.882       | 0.172         |
|    | 113                       | 0.323       | 0.118           | 0.882       | 0.205         |
|    | 115.5                     | 0.355       | 0.176           | 0.824       | 0.179         |
|    | 118.5                     | 0.387       | 0.176           | 0.824       | 0.211         |
|    | 121                       | 0.419       | 0.176           | 0.824       | 0.243         |
|    | 124.5                     | 0.452       | 0.176           | 0.824       | 0.276         |
|    | 128                       | 0.484       | 0.176           | 0.824       | 0.308         |
|    | 129.5                     | 0.516       | 0.176           | 0.824       | 0.34          |
|    | 130.5                     | 0.548       | 0.176           | 0.824       | 0.372         |
|    | 134                       | 0.581       | 0.176           | 0.824       | 0.405         |
|    | 139.5                     | 0.677       | 0.176           | 0.824       | 0.501         |
|    | 142.5                     | 0.71        | 0.176           | 0.824       | 0.534         |
|    | 146.5                     | 0.71        | 0.235           | 0.765       | 0.475         |
|    | 150.5                     | 0.742       | 0.235           | 0.765       | 0.507         |
|    | 154                       | 0.774       | 0.235           | 0.765       | 0.539         |
|    | 157.5                     | 0.774       | 0.294           | 0.706       | 0.48          |
|    | 159.5                     | 0.806       | 0.294           | 0.706       | 0.512         |
|    | 162                       | 0.839       | 0.294           | 0.706       | 0.545         |
|    | 168                       | 0.871       | 0.294           | 0.706       | 0.577         |
|    | 175                       | 0.871       | 0.353           | 0.647       | 0.518         |
|    | 178.5                     | 0.871       | 0.412           | 0.588       | 0.459         |
|    | 180.5                     | 0.871       | 0.471           | 0.529       | 0.4           |
|    | 184.5                     | 0.871       | 0.529           | 0.471       | 0.342         |
|    | 190.5                     | 0.903       | 0.529           | 0.471       | 0.374         |
|    | 193.5                     | 0.903       | 0.588           | 0.412       | 0.315         |
|    | 196.5                     | 0.903       | 0.706           | 0.294       | 0.197         |
|    | 200                       | 0.903       | 0.765           | 0.235       | 0.138         |
|    | 203.5                     | 0.903       | 0.824           | 0.176       | 0.079         |
|    | 207                       | 0.935       | 0.824           | 0.176       | 0.111         |
|    | 213.5                     | 0.935       | 0.882           | 0.118       | 0.053         |
|    | 232.5                     | 0.935       | 0.941           | 0.059       | -0.006        |
|    | 255.5                     | 0.968       | 0.941           | 0.059       | 0.027         |
|    | 269.5                     | 0.968       | 1               | 0           | -0.032        |
|    | 275                       | 1           | 1               | 0           | 0             |

Table S1: Threshold analysis to identify the statistically optimal CT-HU cut-off level for diagnosis of low BMD.

| L2 | Value equal or lower than | Sensitivity | 1 - Specificity | Specificity | Youden J stat |
|----|---------------------------|-------------|-----------------|-------------|---------------|
|    | 29                        | 0           | 0               | 1           | 0             |
|    | 50.5                      | 0.032       | 0               | 1           | 0.032         |
|    | 72                        | 0.065       | 0               | 1           | 0.065         |
|    | 76.5                      | 0.097       | 0               | 1           | 0.097         |
|    | 87.5                      | 0.161       | 0               | 1           | 0.161         |
|    | 96                        | 0.194       | 0               | 1           | 0.194         |
|    | 97.5                      | 0.194       | 0.118           | 0.882       | 0.076         |
|    | 101                       | 0.226       | 0.118           | 0.882       | 0.108         |
|    | 106                       | 0.258       | 0.118           | 0.882       | 0.14          |
|    | 111                       | 0.323       | 0.118           | 0.882       | 0.205         |
|    | 116.5                     | 0.387       | 0.118           | 0.882       | 0.269         |
|    | 119.5                     | 0.452       | 0.118           | 0.882       | 0.334         |
|    | 120.5                     | 0.516       | 0.118           | 0.882       | 0.398         |
|    | 121.5                     | 0.581       | 0.118           | 0.882       | 0.463         |
|    | 123.5                     | 0.613       | 0.118           | 0.882       | 0.495         |
|    | 127.5                     | 0.645       | 0.118           | 0.882       | 0.527         |
|    | 131                       | 0.645       | 0.176           | 0.824       | 0.469         |
|    | 135                       | 0.677       | 0.176           | 0.824       | 0.501         |
|    | 144                       | 0.71        | 0.176           | 0.824       | 0.534         |
|    | 152                       | 0.774       | 0.176           | 0.824       | 0.598         |
|    | 156.5                     | 0.774       | 0.235           | 0.765       | 0.539         |
|    | 159.5                     | 0.806       | 0.235           | 0.765       | 0.571         |
|    | 163                       | 0.806       | 0.294           | 0.706       | 0.512         |
|    | 168                       | 0.839       | 0.294           | 0.706       | 0.545         |
|    | 171.5                     | 0.839       | 0.353           | 0.647       | 0.486         |
|    | 177.5                     | 0.839       | 0.412           | 0.588       | 0.427         |
|    | 183.5                     | 0.839       | 0.471           | 0.529       | 0.368         |
|    | 186                       | 0.871       | 0.471           | 0.529       | 0.4           |
|    | 187.5                     | 0.903       | 0.471           | 0.529       | 0.432         |
|    | 189                       | 0.903       | 0.529           | 0.471       | 0.374         |
|    | 191                       | 0.903       | 0.588           | 0.412       | 0.315         |
|    | 192.5                     | 0.903       | 0.647           | 0.353       | 0.256         |
|    | 193.5                     | 0.903       | 0.706           | 0.294       | 0.197         |
|    | 195.5                     | 0.935       | 0.706           | 0.294       | 0.229         |
|    | 200                       | 0.935       | 0.765           | 0.235       | 0.17          |
|    | 206                       | 0.935       | 0.824           | 0.176       | 0.111         |
|    | 210                       | 0.935       | 0.882           | 0.118       | 0.053         |
|    | 211.5                     | 0.935       | 0.941           | 0.059       | -0.006        |
|    | 228                       | 0.935       | 1               | 0           | -0.065        |
|    | 249.5                     | 0.968       | 1               | 0           | -0.032        |
|    | 256                       | 1           | 1               | 0           | 0             |

Table S1: Threshold analysis to identify the statistically optimal CT-HU cut-off level for diagnosis of low BMD.

| <b>L3</b> | Value equal or lower than | Sensitivity | 1-Specificity | Specificity | Youden J stat |
|-----------|---------------------------|-------------|---------------|-------------|---------------|
|           | 29                        | 0           | 0             | 1           | 0             |
|           | 46.5                      | 0.032       | 0             | 1           | 0.032         |
|           | 71.5                      | 0.097       | 0             | 1           | 0.097         |
|           | 81.5                      | 0.129       | 0             | 1           | 0.129         |
|           | 83.5                      | 0.161       | 0             | 1           | 0.161         |
|           | 85.5                      | 0.194       | 0             | 1           | 0.194         |
|           | 87.5                      | 0.194       | 0.059         | 0.941       | 0.135         |
|           | 89.5                      | 0.226       | 0.059         | 0.941       | 0.167         |
|           | 94.5                      | 0.226       | 0.118         | 0.882       | 0.108         |
|           | 100.5                     | 0.258       | 0.118         | 0.882       | 0.14          |
|           | 105                       | 0.29        | 0.118         | 0.882       | 0.172         |
|           | 109                       | 0.323       | 0.118         | 0.882       | 0.205         |
|           | 111.5                     | 0.387       | 0.118         | 0.882       | 0.269         |
|           | 112.5                     | 0.419       | 0.118         | 0.882       | 0.301         |
|           | 114                       | 0.484       | 0.118         | 0.882       | 0.366         |
|           | 115.5                     | 0.516       | 0.118         | 0.882       | 0.398         |
|           | 116.5                     | 0.516       | 0.176         | 0.824       | 0.34          |
|           | 120                       | 0.548       | 0.176         | 0.824       | 0.372         |
|           | 123.5                     | 0.581       | 0.176         | 0.824       | 0.405         |
|           | 124.5                     | 0.613       | 0.176         | 0.824       | 0.437         |
|           | 129.5                     | 0.645       | 0.176         | 0.824       | 0.469         |
|           | 134.5                     | 0.677       | 0.176         | 0.824       | 0.501         |
|           | 136.5                     | 0.71        | 0.176         | 0.824       | 0.534         |
|           | 140                       | 0.742       | 0.176         | 0.824       | 0.566         |
|           | 144.5                     | 0.774       | 0.176         | 0.824       | 0.598         |
|           | 148.5                     | 0.839       | 0.176         | 0.824       | 0.663         |
|           | 151                       | 0.839       | 0.235         | 0.765       | 0.604         |
|           | 153                       | 0.839       | 0.294         | 0.706       | 0.545         |
|           | 157                       | 0.839       | 0.353         | 0.647       | 0.486         |
|           | 160.5                     | 0.839       | 0.412         | 0.588       | 0.427         |
|           | 162                       | 0.871       | 0.412         | 0.588       | 0.459         |
|           | 165                       | 0.871       | 0.471         | 0.529       | 0.4           |
|           | 172.5                     | 0.871       | 0.529         | 0.471       | 0.342         |
|           | 183                       | 0.903       | 0.529         | 0.471       | 0.374         |
|           | 189.5                     | 0.903       | 0.588         | 0.412       | 0.315         |
|           | 191.5                     | 0.903       | 0.647         | 0.353       | 0.256         |
|           | 192.5                     | 0.903       | 0.706         | 0.294       | 0.197         |
|           | 193.5                     | 0.903       | 0.765         | 0.235       | 0.138         |
|           | 195                       | 0.903       | 0.824         | 0.176       | 0.079         |
|           | 198                       | 0.935       | 0.824         | 0.176       | 0.111         |
|           | 207                       | 0.935       | 0.882         | 0.118       | 0.053         |
|           | 216                       | 0.935       | 0.941         | 0.059       | -0.006        |
|           | 225                       | 0.935       | 1             | 0           | -0.065        |
|           | 238                       | 0.968       | 1             | 0           | -0.032        |
|           | 245                       | 1           | 1             | 0           | 0             |

Table S1: Threshold analysis to identify the statistically optimal CT-HU cut-off level for diagnosis of low BMD.

| L4 | Value equal or lower than | Sensitivity | 1-Specificity | Specificity | Youden J stat |
|----|---------------------------|-------------|---------------|-------------|---------------|
|    | 2                         | 0           | 0             | 1           | 0             |
|    | 36                        | 0.032       | 0             | 1           | 0.032         |
|    | 69.5                      | 0.065       | 0             | 1           | 0.065         |
|    | 71                        | 0.097       | 0             | 1           | 0.097         |
|    | 72.5                      | 0.129       | 0             | 1           | 0.129         |
|    | 77.5                      | 0.161       | 0             | 1           | 0.161         |
|    | 82.5                      | 0.194       | 0             | 1           | 0.194         |
|    | 88                        | 0.226       | 0             | 1           | 0.226         |
|    | 94.5                      | 0.258       | 0             | 1           | 0.258         |
|    | 96.5                      | 0.323       | 0             | 1           | 0.323         |
|    | 100.5                     | 0.323       | 0.059         | 0.941       | 0.264         |
|    | 104.5                     | 0.355       | 0.059         | 0.941       | 0.296         |
|    | 107.5                     | 0.419       | 0.059         | 0.941       | 0.36          |
|    | 112.5                     | 0.452       | 0.118         | 0.882       | 0.334         |
|    | 116                       | 0.516       | 0.118         | 0.882       | 0.398         |
|    | 120                       | 0.548       | 0.118         | 0.882       | 0.43          |
|    | 124.5                     | 0.581       | 0.118         | 0.882       | 0.463         |
|    | 128                       | 0.613       | 0.118         | 0.882       | 0.495         |
|    | 130.5                     | 0.613       | 0.176         | 0.824       | 0.437         |
|    | 132.5                     | 0.645       | 0.176         | 0.824       | 0.469         |
|    | 135.5                     | 0.677       | 0.176         | 0.824       | 0.501         |
|    | 137.5                     | 0.71        | 0.176         | 0.824       | 0.534         |
|    | 142.5                     | 0.742       | 0.176         | 0.824       | 0.566         |
|    | 148.5                     | 0.774       | 0.235         | 0.765       | 0.539         |
|    | 152                       | 0.806       | 0.235         | 0.765       | 0.571         |
|    | 157                       | 0.806       | 0.294         | 0.706       | 0.512         |
|    | 164                       | 0.806       | 0.353         | 0.647       | 0.453         |
|    | 170                       | 0.839       | 0.353         | 0.647       | 0.486         |
|    | 173.5                     | 0.903       | 0.412         | 0.588       | 0.491         |
|    | 179                       | 0.903       | 0.471         | 0.529       | 0.432         |
|    | 184                       | 0.903       | 0.529         | 0.471       | 0.374         |
|    | 187                       | 0.903       | 0.588         | 0.412       | 0.315         |
|    | 194.5                     | 0.903       | 0.647         | 0.353       | 0.256         |
|    | 201                       | 0.903       | 0.706         | 0.294       | 0.197         |
|    | 204.5                     | 0.935       | 0.765         | 0.235       | 0.17          |
|    | 210                       | 0.935       | 0.824         | 0.176       | 0.111         |
|    | 215                       | 0.935       | 0.882         | 0.118       | 0.053         |
|    | 222.5                     | 0.935       | 0.941         | 0.059       | -0.006        |
|    | 233                       | 0.935       | 1             | 0           | -0.065        |
|    | 252                       | 0.968       | 1             | 0           | -0.032        |
|    | 267                       | 1           | 1             | 0           | 0             |

Table S1: Threshold analysis to identify the statistically optimal CT-HU cut-off level for diagnosis of low BMD.

| L5 | Value equal or lower than | Sensitivity | 1-Specificity | Specificity | Youden J Stat |
|----|---------------------------|-------------|---------------|-------------|---------------|
|    | 22                        | 0           | 0             | 1           | 0             |
|    | 46                        | 0.032       | 0             | 1           | 0.032         |
|    | 71                        | 0.065       | 0             | 1           | 0.065         |
|    | 73.5                      | 0.065       | 0.059         | 0.941       | 0.006         |
|    | 78                        | 0.097       | 0.059         | 0.941       | 0.038         |
|    | 83                        | 0.129       | 0.059         | 0.941       | 0.07          |
|    | 87.5                      | 0.161       | 0.059         | 0.941       | 0.102         |
|    | 93                        | 0.194       | 0.059         | 0.941       | 0.135         |
|    | 97                        | 0.226       | 0.059         | 0.941       | 0.167         |
|    | 100                       | 0.258       | 0.059         | 0.941       | 0.199         |
|    | 102                       | 0.29        | 0.059         | 0.941       | 0.231         |
|    | 103.5                     | 0.323       | 0.059         | 0.941       | 0.264         |
|    | 104.5                     | 0.323       | 0.118         | 0.882       | 0.205         |
|    | 105.5                     | 0.355       | 0.118         | 0.882       | 0.237         |
|    | 107                       | 0.387       | 0.118         | 0.882       | 0.269         |
|    | 109                       | 0.419       | 0.118         | 0.882       | 0.301         |
|    | 111.5                     | 0.484       | 0.118         | 0.882       | 0.366         |
|    | 116                       | 0.516       | 0.118         | 0.882       | 0.398         |
|    | 121                       | 0.548       | 0.118         | 0.882       | 0.43          |
|    | 127.5                     | 0.581       | 0.118         | 0.882       | 0.463         |
|    | 133                       | 0.613       | 0.118         | 0.882       | 0.495         |
|    | 136.5                     | 0.645       | 0.118         | 0.882       | 0.527         |
|    | 140.5                     | 0.645       | 0.176         | 0.824       | 0.469         |
|    | 142.5                     | 0.677       | 0.176         | 0.824       | 0.501         |
|    | 144                       | 0.71        | 0.176         | 0.824       | 0.534         |
|    | 150                       | 0.742       | 0.176         | 0.824       | 0.566         |
|    | 157                       | 0.774       | 0.176         | 0.824       | 0.598         |
|    | 160                       | 0.774       | 0.235         | 0.765       | 0.539         |
|    | 162                       | 0.774       | 0.294         | 0.706       | 0.48          |
|    | 164                       | 0.774       | 0.353         | 0.647       | 0.421         |
|    | 167.5                     | 0.774       | 0.412         | 0.588       | 0.362         |
|    | 171                       | 0.806       | 0.412         | 0.588       | 0.394         |
|    | 175                       | 0.806       | 0.471         | 0.529       | 0.335         |
|    | 178.5                     | 0.806       | 0.529         | 0.471       | 0.277         |
|    | 180.5                     | 0.839       | 0.529         | 0.471       | 0.31          |
|    | 183                       | 0.839       | 0.588         | 0.412       | 0.251         |
|    | 188.5                     | 0.839       | 0.647         | 0.353       | 0.192         |
|    | 197                       | 0.871       | 0.647         | 0.353       | 0.224         |
|    | 202                       | 0.903       | 0.647         | 0.353       | 0.256         |
|    | 203.5                     | 0.903       | 0.706         | 0.294       | 0.197         |
|    | 206                       | 0.903       | 0.765         | 0.235       | 0.138         |
|    | 208.5                     | 0.903       | 0.824         | 0.176       | 0.079         |
|    | 211                       | 0.903       | 0.882         | 0.118       | 0.021         |
|    | 214                       | 0.935       | 0.882         | 0.118       | 0.053         |
|    | 218                       | 0.935       | 0.941         | 0.059       | -0.006        |
|    | 222.5                     | 0.935       | 1             | 0           | -0.065        |
|    | 242                       | 0.968       | 1             | 0           | -0.032        |
|    | 261                       | 1           | 1             | 0           | 0             |

Table S1: Threshold analysis to identify the statistically optimal CT-HU cut-off level for diagnosis of low BMD.

| Avg | Value equal or lower than | Sensitivity | 1-Specificity | Specificity | Youden J stat |
|-----|---------------------------|-------------|---------------|-------------|---------------|
|     | 21                        | 0           | 0             | 1           | 0             |
|     | 49                        | 0.032       | 0             | 1           | 0.032         |
|     | 78                        | 0.065       | 0             | 1           | 0.065         |
|     | 82                        | 0.097       | 0             | 1           | 0.097         |
|     | 87                        | 0.129       | 0             | 1           | 0.129         |
|     | 91                        | 0.161       | 0             | 1           | 0.161         |
|     | 93                        | 0.194       | 0             | 1           | 0.194         |
|     | 96                        | 0.194       | 0.059         | 0.941       | 0.135         |
|     | 100                       | 0.226       | 0.059         | 0.941       | 0.167         |
|     | 102.5                     | 0.258       | 0.059         | 0.941       | 0.199         |
|     | 106.5                     | 0.258       | 0.118         | 0.882       | 0.14          |
|     | 111                       | 0.29        | 0.118         | 0.882       | 0.172         |
|     | 112.5                     | 0.323       | 0.118         | 0.882       | 0.205         |
|     | 115                       | 0.355       | 0.118         | 0.882       | 0.237         |
|     | 118                       | 0.419       | 0.118         | 0.882       | 0.301         |
|     | 120                       | 0.452       | 0.118         | 0.882       | 0.334         |
|     | 121.5                     | 0.516       | 0.118         | 0.882       | 0.398         |
|     | 122.5                     | 0.548       | 0.118         | 0.882       | 0.43          |
|     | 124                       | 0.581       | 0.118         | 0.882       | 0.463         |
|     | 125.5                     | 0.613       | 0.118         | 0.882       | 0.495         |
|     | 126.5                     | 0.613       | 0.176         | 0.824       | 0.437         |
|     | 129                       | 0.645       | 0.176         | 0.824       | 0.469         |
|     | 137.5                     | 0.677       | 0.176         | 0.824       | 0.501         |
|     | 145.5                     | 0.71        | 0.176         | 0.824       | 0.534         |
|     | 149                       | 0.742       | 0.176         | 0.824       | 0.566         |
|     | 154                       | 0.774       | 0.176         | 0.824       | 0.598         |
|     | 159.5                     | 0.806       | 0.235         | 0.765       | 0.571         |
|     | 162.5                     | 0.806       | 0.294         | 0.706       | 0.512         |
|     | 164.5                     | 0.839       | 0.294         | 0.706       | 0.545         |
|     | 167                       | 0.839       | 0.353         | 0.647       | 0.486         |
|     | 169.5                     | 0.839       | 0.412         | 0.588       | 0.427         |
|     | 172                       | 0.839       | 0.471         | 0.529       | 0.368         |
|     | 174                       | 0.871       | 0.471         | 0.529       | 0.4           |
|     | 180.5                     | 0.871       | 0.529         | 0.471       | 0.342         |
|     | 187.75                    | 0.871       | 0.588         | 0.412       | 0.283         |
|     | 189.75                    | 0.903       | 0.588         | 0.412       | 0.315         |
|     | 192                       | 0.935       | 0.588         | 0.412       | 0.347         |
|     | 196                       | 0.935       | 0.647         | 0.353       | 0.288         |
|     | 200                       | 0.935       | 0.706         | 0.294       | 0.229         |
|     | 203                       | 0.935       | 0.765         | 0.235       | 0.17          |
|     | 204.5                     | 0.935       | 0.824         | 0.176       | 0.111         |
|     | 211                       | 0.935       | 0.882         | 0.118       | 0.053         |
|     | 222.5                     | 0.935       | 0.941         | 0.059       | -0.006        |
|     | 234                       | 0.935       | 1             | 0           | -0.065        |
|     | 251.5                     | 0.968       | 1             | 0           | -0.032        |
|     | 264                       | 1           | 1             | 0           | 0             |

Table S1: Threshold analysis to identify the statistically optimal CT-HU cut-off level for diagnosis of low BMD.

| <b>T12</b> | Value equal or lower than | Sensitivity | 1-Specificity | Specificity | Youden J stat |
|------------|---------------------------|-------------|---------------|-------------|---------------|
|            | 42                        | 0           | 0             | 1           | 0             |
|            | 64                        | 0           | 0.024         | 0.976       | -0.024        |
|            | 93.5                      | 0           | 0.071         | 0.929       | -0.071        |
|            | 103                       | 0.167       | 0.095         | 0.905       | 0.072         |
|            | 106.5                     | 0.167       | 0.143         | 0.857       | 0.024         |
|            | 109.5                     | 0.167       | 0.167         | 0.833       | 0             |
|            | 110.5                     | 0.167       | 0.19          | 0.81        | -0.023        |
|            | 114                       | 0.333       | 0.19          | 0.81        | 0.143         |
|            | 118                       | 0.333       | 0.214         | 0.786       | 0.119         |
|            | 120                       | 0.333       | 0.262         | 0.738       | 0.071         |
|            | 122.5                     | 0.333       | 0.286         | 0.714       | 0.047         |
|            | 125                       | 0.333       | 0.31          | 0.69        | 0.023         |
|            | 126.5                     | 0.333       | 0.333         | 0.667       | 0             |
|            | 129.5                     | 0.5         | 0.357         | 0.643       | 0.143         |
|            | 132.5                     | 0.667       | 0.357         | 0.643       | 0.31          |
|            | 133.5                     | 0.667       | 0.381         | 0.619       | 0.286         |
|            | 138                       | 0.667       | 0.405         | 0.595       | 0.262         |
|            | 142.5                     | 0.833       | 0.405         | 0.595       | 0.428         |
|            | 144                       | 0.833       | 0.429         | 0.571       | 0.404         |
|            | 146.5                     | 1           | 0.429         | 0.571       | 0.571         |
|            | 149                       | 1           | 0.452         | 0.548       | 0.548         |
|            | 152                       | 1           | 0.476         | 0.524       | 0.524         |
|            | 156                       | 1           | 0.5           | 0.5         | 0.5           |
|            | 159                       | 1           | 0.524         | 0.476       | 0.476         |
|            | 163                       | 1           | 0.548         | 0.452       | 0.452         |
|            | 167                       | 1           | 0.571         | 0.429       | 0.429         |
|            | 168.5                     | 1           | 0.595         | 0.405       | 0.405         |
|            | 171.5                     | 1           | 0.643         | 0.357       | 0.357         |
|            | 176                       | 1           | 0.667         | 0.333       | 0.333         |
|            | 179.5                     | 1           | 0.69          | 0.31        | 0.31          |
|            | 183.5                     | 1           | 0.738         | 0.262       | 0.262         |
|            | 194.5                     | 1           | 0.762         | 0.238       | 0.238         |
|            | 204                       | 1           | 0.81          | 0.19        | 0.19          |
|            | 207.5                     | 1           | 0.833         | 0.167       | 0.167         |
|            | 214                       | 1           | 0.881         | 0.119       | 0.119         |
|            | 222                       | 1           | 0.905         | 0.095       | 0.095         |
|            | 232                       | 1           | 0.929         | 0.071       | 0.071         |
|            | 246.5                     | 1           | 0.952         | 0.048       | 0.048         |
|            | 267.5                     | 1           | 0.976         | 0.024       | 0.024         |
|            | 281                       | 1           | 1             | 0           | 0             |



Table S2. Threshold analysis to identify the statistically optimal CT-HU cut-off level for diagnosis of Osteoporosis.

| L1 | Value equal or lower than | Sensitivity | 1-Specificity | Specificity | Youden J stat |
|----|---------------------------|-------------|---------------|-------------|---------------|
|    | -1                        | 0           | 0             | 1           | 0             |
|    | 41                        | 0           | 0.024         | 0.976       | -0.024        |
|    | 84                        | 0           | 0.048         | 0.952       | -0.048        |
|    | 88                        | 0           | 0.071         | 0.929       | -0.071        |
|    | 91                        | 0           | 0.095         | 0.905       | -0.095        |
|    | 97.5                      | 0           | 0.119         | 0.881       | -0.119        |
|    | 104                       | 0.167       | 0.119         | 0.881       | 0.048         |
|    | 105.5                     | 0.333       | 0.119         | 0.881       | 0.214         |
|    | 108.5                     | 0.333       | 0.167         | 0.833       | 0.166         |
|    | 111.5                     | 0.5         | 0.19          | 0.81        | 0.31          |
|    | 113                       | 0.667       | 0.19          | 0.81        | 0.477         |
|    | 115.5                     | 0.667       | 0.238         | 0.762       | 0.429         |
|    | 118.5                     | 0.667       | 0.262         | 0.738       | 0.405         |
|    | 121                       | 0.833       | 0.262         | 0.738       | 0.571         |
|    | 124.5                     | 0.833       | 0.286         | 0.714       | 0.547         |
|    | 128                       | 0.833       | 0.31          | 0.69        | 0.523         |
|    | 129.5                     | 0.833       | 0.333         | 0.667       | 0.5           |
|    | 130.5                     | 0.833       | 0.357         | 0.643       | 0.476         |
|    | 134                       | 1           | 0.357         | 0.643       | 0.643         |
|    | 139.5                     | 1           | 0.429         | 0.571       | 0.571         |
|    | 142.5                     | 1           | 0.452         | 0.548       | 0.548         |
|    | 146.5                     | 1           | 0.476         | 0.524       | 0.524         |
|    | 150.5                     | 1           | 0.5           | 0.5         | 0.5           |
|    | 154                       | 1           | 0.524         | 0.476       | 0.476         |
|    | 157.5                     | 1           | 0.548         | 0.452       | 0.452         |
|    | 159.5                     | 1           | 0.571         | 0.429       | 0.429         |
|    | 162                       | 1           | 0.595         | 0.405       | 0.405         |
|    | 168                       | 1           | 0.619         | 0.381       | 0.381         |
|    | 175                       | 1           | 0.643         | 0.357       | 0.357         |
|    | 178.5                     | 1           | 0.667         | 0.333       | 0.333         |
|    | 180.5                     | 1           | 0.69          | 0.31        | 0.31          |
|    | 184.5                     | 1           | 0.714         | 0.286       | 0.286         |
|    | 190.5                     | 1           | 0.738         | 0.262       | 0.262         |
|    | 193.5                     | 1           | 0.762         | 0.238       | 0.238         |
|    | 196.5                     | 1           | 0.81          | 0.19        | 0.19          |
|    | 200                       | 1           | 0.833         | 0.167       | 0.167         |
|    | 203.5                     | 1           | 0.857         | 0.143       | 0.143         |
|    | 207                       | 1           | 0.881         | 0.119       | 0.119         |
|    | 213.5                     | 1           | 0.905         | 0.095       | 0.095         |
|    | 232.5                     | 1           | 0.929         | 0.071       | 0.071         |
|    | 255.5                     | 1           | 0.952         | 0.048       | 0.048         |
|    | 269.5                     | 1           | 0.976         | 0.024       | 0.024         |
|    | 275                       | 1           | 1             | 0           | 0             |

Table S2. Threshold analysis to identify the statistically optimal CT-HU cut-off level for diagnosis of Osteoporosis.

| L2 | Value equal or lower than | Sensitivity | 1-Specificity | Specificity | Youden J stat |
|----|---------------------------|-------------|---------------|-------------|---------------|
|    | 29                        | 0           | 0             | 1           | 0             |
|    | 50.5                      | 0           | 0.024         | 0.976       | -0.024        |
|    | 72                        | 0.167       | 0.024         | 0.976       | 0.143         |
|    | 76.5                      | 0.167       | 0.048         | 0.952       | 0.119         |
|    | 87.5                      | 0.167       | 0.095         | 0.905       | 0.072         |
|    | 96                        | 0.167       | 0.119         | 0.881       | 0.048         |
|    | 97.5                      | 0.167       | 0.167         | 0.833       | 0             |
|    | 101                       | 0.333       | 0.167         | 0.833       | 0.166         |
|    | 106                       | 0.333       | 0.19          | 0.81        | 0.143         |
|    | 111                       | 0.5         | 0.214         | 0.786       | 0.286         |
|    | 116.5                     | 0.667       | 0.238         | 0.762       | 0.429         |
|    | 119.5                     | 0.667       | 0.286         | 0.714       | 0.381         |
|    | 120.5                     | 0.667       | 0.333         | 0.667       | 0.334         |
|    | 121.5                     | 0.833       | 0.357         | 0.643       | 0.476         |
|    | 123.5                     | 0.833       | 0.381         | 0.619       | 0.452         |
|    | 127.5                     | 0.833       | 0.405         | 0.595       | 0.428         |
|    | 131                       | 0.833       | 0.429         | 0.571       | 0.404         |
|    | 135                       | 0.833       | 0.452         | 0.548       | 0.381         |
|    | 144                       | 0.833       | 0.476         | 0.524       | 0.357         |
|    | 152                       | 1           | 0.5           | 0.5         | 0.5           |
|    | 156.5                     | 1           | 0.524         | 0.476       | 0.476         |
|    | 159.5                     | 1           | 0.548         | 0.452       | 0.452         |
|    | 163                       | 1           | 0.571         | 0.429       | 0.429         |
|    | 168                       | 1           | 0.595         | 0.405       | 0.405         |
|    | 171.5                     | 1           | 0.619         | 0.381       | 0.381         |
|    | 177.5                     | 1           | 0.643         | 0.357       | 0.357         |
|    | 183.5                     | 1           | 0.667         | 0.333       | 0.333         |
|    | 186                       | 1           | 0.69          | 0.31        | 0.31          |
|    | 187.5                     | 1           | 0.714         | 0.286       | 0.286         |
|    | 189                       | 1           | 0.738         | 0.262       | 0.262         |
|    | 191                       | 1           | 0.762         | 0.238       | 0.238         |
|    | 192.5                     | 1           | 0.786         | 0.214       | 0.214         |
|    | 193.5                     | 1           | 0.81          | 0.19        | 0.19          |
|    | 195.5                     | 1           | 0.833         | 0.167       | 0.167         |
|    | 200                       | 1           | 0.857         | 0.143       | 0.143         |
|    | 206                       | 1           | 0.881         | 0.119       | 0.119         |
|    | 210                       | 1           | 0.905         | 0.095       | 0.095         |
|    | 211.5                     | 1           | 0.929         | 0.071       | 0.071         |
|    | 228                       | 1           | 0.952         | 0.048       | 0.048         |
|    | 249.5                     | 1           | 0.976         | 0.024       | 0.024         |
|    | 256                       | 1           | 1             | 0           | 0             |

Table S2. Threshold analysis to identify the statistically optimal CT-HU cut-off level for diagnosis of Osteoporosis.

| L3 | Value equal or lower than | Sensitivity | 1-Specificity | Specificity | Youden J stat |
|----|---------------------------|-------------|---------------|-------------|---------------|
|    | 29                        | 0           | 0             | 1           | 0             |
|    | 46.5                      | 0           | 0.024         | 0.976       | -0.024        |
|    | 71.5                      | 0           | 0.071         | 0.929       | -0.071        |
|    | 81.5                      | 0           | 0.095         | 0.905       | -0.095        |
|    | 83.5                      | 0           | 0.119         | 0.881       | -0.119        |
|    | 85.5                      | 0           | 0.143         | 0.857       | -0.143        |
|    | 87.5                      | 0           | 0.167         | 0.833       | -0.167        |
|    | 89.5                      | 0.167       | 0.167         | 0.833       | 0             |
|    | 94.5                      | 0.167       | 0.19          | 0.81        | -0.023        |
|    | 100.5                     | 0.333       | 0.19          | 0.81        | 0.143         |
|    | 105                       | 0.5         | 0.19          | 0.81        | 0.31          |
|    | 109                       | 0.5         | 0.214         | 0.786       | 0.286         |
|    | 111.5                     | 0.5         | 0.262         | 0.738       | 0.238         |
|    | 112.5                     | 0.5         | 0.286         | 0.714       | 0.214         |
|    | 114                       | 0.5         | 0.333         | 0.667       | 0.167         |
|    | 115.5                     | 0.5         | 0.357         | 0.643       | 0.143         |
|    | 116.5                     | 0.5         | 0.381         | 0.619       | 0.119         |
|    | 120                       | 0.667       | 0.381         | 0.619       | 0.286         |
|    | 123.5                     | 0.667       | 0.405         | 0.595       | 0.262         |
|    | 124.5                     | 0.667       | 0.429         | 0.571       | 0.238         |
|    | 129.5                     | 0.833       | 0.429         | 0.571       | 0.404         |
|    | 134.5                     | 1           | 0.429         | 0.571       | 0.571         |
|    | 136.5                     | 1           | 0.452         | 0.548       | 0.548         |
|    | 140                       | 1           | 0.476         | 0.524       | 0.524         |
|    | 144.5                     | 1           | 0.5           | 0.5         | 0.5           |
|    | 148.5                     | 1           | 0.548         | 0.452       | 0.452         |
|    | 151                       | 1           | 0.571         | 0.429       | 0.429         |
|    | 153                       | 1           | 0.595         | 0.405       | 0.405         |
|    | 157                       | 1           | 0.619         | 0.381       | 0.381         |
|    | 160.5                     | 1           | 0.643         | 0.357       | 0.357         |
|    | 162                       | 1           | 0.667         | 0.333       | 0.333         |
|    | 165                       | 1           | 0.69          | 0.31        | 0.31          |
|    | 172.5                     | 1           | 0.714         | 0.286       | 0.286         |
|    | 183                       | 1           | 0.738         | 0.262       | 0.262         |
|    | 189.5                     | 1           | 0.762         | 0.238       | 0.238         |
|    | 191.5                     | 1           | 0.786         | 0.214       | 0.214         |
|    | 192.5                     | 1           | 0.81          | 0.19        | 0.19          |
|    | 193.5                     | 1           | 0.833         | 0.167       | 0.167         |
|    | 195                       | 1           | 0.857         | 0.143       | 0.143         |
|    | 198                       | 1           | 0.881         | 0.119       | 0.119         |
|    | 207                       | 1           | 0.905         | 0.095       | 0.095         |
|    | 216                       | 1           | 0.929         | 0.071       | 0.071         |
|    | 225                       | 1           | 0.952         | 0.048       | 0.048         |
|    | 238                       | 1           | 0.976         | 0.024       | 0.024         |
|    | 245                       | 1           | 1             | 0           | 0             |

Table S2. Threshold analysis to identify the statistically optimal CT-HU cut-off level for diagnosis of Osteoporosis.

| L4 | Value equal or lower than | Sensitivity | 1-Specificity | Specificity | Youden J stat |
|----|---------------------------|-------------|---------------|-------------|---------------|
|    | 2                         | 0           | 0             | 1           | 0             |
|    | 36                        | 0           | 0.024         | 0.976       | -0.024        |
|    | 69.5                      | 0           | 0.048         | 0.952       | -0.048        |
|    | 71                        | 0.167       | 0.048         | 0.952       | 0.119         |
|    | 72.5                      | 0.167       | 0.071         | 0.929       | 0.096         |
|    | 77.5                      | 0.167       | 0.095         | 0.905       | 0.072         |
|    | 82.5                      | 0.167       | 0.119         | 0.881       | 0.048         |
|    | 88                        | 0.167       | 0.143         | 0.857       | 0.024         |
|    | 94.5                      | 0.333       | 0.143         | 0.857       | 0.19          |
|    | 96.5                      | 0.5         | 0.167         | 0.833       | 0.333         |
|    | 100.5                     | 0.5         | 0.19          | 0.81        | 0.31          |
|    | 104.5                     | 0.667       | 0.19          | 0.81        | 0.477         |
|    | 107.5                     | 0.667       | 0.238         | 0.762       | 0.429         |
|    | 112.5                     | 0.667       | 0.286         | 0.714       | 0.381         |
|    | 116                       | 0.833       | 0.31          | 0.69        | 0.523         |
|    | 120                       | 0.833       | 0.333         | 0.667       | 0.5           |
|    | 124.5                     | 0.833       | 0.357         | 0.643       | 0.476         |
|    | 128                       | 1           | 0.357         | 0.643       | 0.643         |
|    | 130.5                     | 1           | 0.381         | 0.619       | 0.619         |
|    | 132.5                     | 1           | 0.405         | 0.595       | 0.595         |
|    | 135.5                     | 1           | 0.429         | 0.571       | 0.571         |
|    | 137.5                     | 1           | 0.452         | 0.548       | 0.548         |
|    | 142.5                     | 1           | 0.476         | 0.524       | 0.524         |
|    | 148.5                     | 1           | 0.524         | 0.476       | 0.476         |
|    | 152                       | 1           | 0.548         | 0.452       | 0.452         |
|    | 157                       | 1           | 0.571         | 0.429       | 0.429         |
|    | 164                       | 1           | 0.595         | 0.405       | 0.405         |
|    | 170                       | 1           | 0.619         | 0.381       | 0.381         |
|    | 173.5                     | 1           | 0.69          | 0.31        | 0.31          |
|    | 179                       | 1           | 0.714         | 0.286       | 0.286         |
|    | 184                       | 1           | 0.738         | 0.262       | 0.262         |
|    | 187                       | 1           | 0.762         | 0.238       | 0.238         |
|    | 194.5                     | 1           | 0.786         | 0.214       | 0.214         |
|    | 201                       | 1           | 0.81          | 0.19        | 0.19          |
|    | 204.5                     | 1           | 0.857         | 0.143       | 0.143         |
|    | 210                       | 1           | 0.881         | 0.119       | 0.119         |
|    | 215                       | 1           | 0.905         | 0.095       | 0.095         |
|    | 222.5                     | 1           | 0.929         | 0.071       | 0.071         |
|    | 233                       | 1           | 0.952         | 0.048       | 0.048         |
|    | 252                       | 1           | 0.976         | 0.024       | 0.024         |
|    | 267                       | 1           | 1             | 0           | 0             |

Table S2. Threshold analysis to identify the statistically optimal CT-HU cut-off level for diagnosis of Osteoporosis.

| L5 | Value equal or lower than | Sensitivity | 1-Specificity | Specificity | Youden J stat |
|----|---------------------------|-------------|---------------|-------------|---------------|
|    | 22                        | 0           | 0             | 1           | 0             |
|    | 46                        | 0           | 0.024         | 0.976       | -0.024        |
|    | 71                        | 0           | 0.048         | 0.952       | -0.048        |
|    | 73.5                      | 0           | 0.071         | 0.929       | -0.071        |
|    | 78                        | 0           | 0.095         | 0.905       | -0.095        |
|    | 83                        | 0           | 0.119         | 0.881       | -0.119        |
|    | 87.5                      | 0           | 0.143         | 0.857       | -0.143        |
|    | 93                        | 0           | 0.167         | 0.833       | -0.167        |
|    | 97                        | 0.167       | 0.167         | 0.833       | 0             |
|    | 100                       | 0.167       | 0.19          | 0.81        | -0.023        |
|    | 102                       | 0.333       | 0.19          | 0.81        | 0.143         |
|    | 103.5                     | 0.333       | 0.214         | 0.786       | 0.119         |
|    | 104.5                     | 0.333       | 0.238         | 0.762       | 0.095         |
|    | 105.5                     | 0.333       | 0.262         | 0.738       | 0.071         |
|    | 107                       | 0.5         | 0.262         | 0.738       | 0.238         |
|    | 109                       | 0.667       | 0.262         | 0.738       | 0.405         |
|    | 111.5                     | 0.667       | 0.31          | 0.69        | 0.357         |
|    | 116                       | 0.667       | 0.333         | 0.667       | 0.334         |
|    | 121                       | 0.833       | 0.333         | 0.667       | 0.5           |
|    | 127.5                     | 0.833       | 0.357         | 0.643       | 0.476         |
|    | 133                       | 1           | 0.357         | 0.643       | 0.643         |
|    | 136.5                     | 1           | 0.381         | 0.619       | 0.619         |
|    | 140.5                     | 1           | 0.405         | 0.595       | 0.595         |
|    | 142.5                     | 1           | 0.429         | 0.571       | 0.571         |
|    | 144                       | 1           | 0.452         | 0.548       | 0.548         |
|    | 150                       | 1           | 0.476         | 0.524       | 0.524         |
|    | 157                       | 1           | 0.5           | 0.5         | 0.5           |
|    | 160                       | 1           | 0.524         | 0.476       | 0.476         |
|    | 162                       | 1           | 0.548         | 0.452       | 0.452         |
|    | 164                       | 1           | 0.571         | 0.429       | 0.429         |
|    | 167.5                     | 1           | 0.595         | 0.405       | 0.405         |
|    | 171                       | 1           | 0.619         | 0.381       | 0.381         |
|    | 175                       | 1           | 0.643         | 0.357       | 0.357         |
|    | 178.5                     | 1           | 0.667         | 0.333       | 0.333         |
|    | 180.5                     | 1           | 0.69          | 0.31        | 0.31          |
|    | 183                       | 1           | 0.714         | 0.286       | 0.286         |
|    | 188.5                     | 1           | 0.738         | 0.262       | 0.262         |
|    | 197                       | 1           | 0.762         | 0.238       | 0.238         |
|    | 202                       | 1           | 0.786         | 0.214       | 0.214         |
|    | 203.5                     | 1           | 0.81          | 0.19        | 0.19          |
|    | 206                       | 1           | 0.833         | 0.167       | 0.167         |
|    | 208.5                     | 1           | 0.857         | 0.143       | 0.143         |
|    | 211                       | 1           | 0.881         | 0.119       | 0.119         |
|    | 214                       | 1           | 0.905         | 0.095       | 0.095         |
|    | 218                       | 1           | 0.929         | 0.071       | 0.071         |
|    | 222.5                     | 1           | 0.952         | 0.048       | 0.048         |
|    | 242                       | 1           | 0.976         | 0.024       | 0.024         |
|    | 261                       | 1           | 1             | 0           | 0             |

Table S2. Threshold analysis to identify the statistically optimal CT-HU cut-off level for diagnosis of Osteoporosis.

| Avg | Value equal or lower than | Sensitivity | 1-Specificity | Specificity | Youden J stat |
|-----|---------------------------|-------------|---------------|-------------|---------------|
|     | 21                        | 0           | 0             | 1           | 0             |
|     | 49                        | 0           | 0.024         | 0.976       | -0.024        |
|     | 78                        | 0           | 0.048         | 0.952       | -0.048        |
|     | 82                        | 0           | 0.071         | 0.929       | -0.071        |
|     | 87                        | 0           | 0.095         | 0.905       | -0.095        |
|     | 91                        | 0           | 0.119         | 0.881       | -0.119        |
|     | 93                        | 0.167       | 0.119         | 0.881       | 0.048         |
|     | 96                        | 0.167       | 0.143         | 0.857       | 0.024         |
|     | 100                       | 0.167       | 0.167         | 0.833       | 0             |
|     | 102.5                     | 0.333       | 0.167         | 0.833       | 0.166         |
|     | 106.5                     | 0.333       | 0.19          | 0.81        | 0.143         |
|     | 111                       | 0.5         | 0.19          | 0.81        | 0.31          |
|     | 112.5                     | 0.5         | 0.214         | 0.786       | 0.286         |
|     | 115                       | 0.5         | 0.238         | 0.762       | 0.262         |
|     | 118                       | 0.5         | 0.286         | 0.714       | 0.214         |
|     | 120                       | 0.5         | 0.31          | 0.69        | 0.19          |
|     | 121.5                     | 0.833       | 0.31          | 0.69        | 0.523         |
|     | 122.5                     | 0.833       | 0.333         | 0.667       | 0.5           |
|     | 124                       | 0.833       | 0.357         | 0.643       | 0.476         |
|     | 125.5                     | 0.833       | 0.381         | 0.619       | 0.452         |
|     | 126.5                     | 0.833       | 0.405         | 0.595       | 0.428         |
|     | 129                       | 1           | 0.405         | 0.595       | 0.595         |
|     | 137.5                     | 1           | 0.429         | 0.571       | 0.571         |
|     | 145.5                     | 1           | 0.452         | 0.548       | 0.548         |
|     | 149                       | 1           | 0.476         | 0.524       | 0.524         |
|     | 154                       | 1           | 0.5           | 0.5         | 0.5           |
|     | 159.5                     | 1           | 0.548         | 0.452       | 0.452         |
|     | 162.5                     | 1           | 0.571         | 0.429       | 0.429         |
|     | 164.5                     | 1           | 0.595         | 0.405       | 0.405         |
|     | 167                       | 1           | 0.619         | 0.381       | 0.381         |
|     | 169.5                     | 1           | 0.643         | 0.357       | 0.357         |
|     | 172                       | 1           | 0.667         | 0.333       | 0.333         |
|     | 174                       | 1           | 0.69          | 0.31        | 0.31          |
|     | 180.5                     | 1           | 0.714         | 0.286       | 0.286         |
|     | 187.75                    | 1           | 0.738         | 0.262       | 0.262         |
|     | 189.75                    | 1           | 0.762         | 0.238       | 0.238         |
|     | 192                       | 1           | 0.786         | 0.214       | 0.214         |
|     | 196                       | 1           | 0.81          | 0.19        | 0.19          |
|     | 200                       | 1           | 0.833         | 0.167       | 0.167         |
|     | 203                       | 1           | 0.857         | 0.143       | 0.143         |
|     | 204.5                     | 1           | 0.881         | 0.119       | 0.119         |
|     | 211                       | 1           | 0.905         | 0.095       | 0.095         |
|     | 222.5                     | 1           | 0.929         | 0.071       | 0.071         |
|     | 234                       | 1           | 0.952         | 0.048       | 0.048         |
|     | 251.5                     | 1           | 0.976         | 0.024       | 0.024         |
|     | 264                       | 1           | 1             | 0           | 0             |
